# Supplementary material for: Socioeconomic Inequalities in COVID-19 Vaccine Hesitancy and Uptake in Greece and Cyprus during the Pandemic
Source: MDPI journal article supplement (doi:10.3390/vaccines11081301), 2023-07-31
Supplement: s1 [file s1]

**Table S1.** Mean difference in COVID-19 vaccine hesitancy scale by socioeconomic characteristics of study participants, stratified by country of residence.

| Mean difference (95% CI)*        |                      |                      |                      |                                 |
|----------------------------------|----------------------|----------------------|----------------------|---------------------------------|
| Area of residence                | Whole sample         | Greece               | Cyprus               | <i>p</i> -value for interaction |
| Urban (≥10000 residents)         | reference            | reference            | reference            |                                 |
| Semi-urban (2000-9999 residents) | 4.27 (1.16, 7.38)    | 3.56 (-1.05, 8.18)   | 4.54 (0.37, 8.71)    | 0.66                            |
| Rural (<2000 residents)          | -1.12 (-3.25, 1.00)  | -2.14 (-4.54, 0.26)  | 3.00 (-1.50, 7.51)   | 0.10                            |
| <b>Educational attainment</b>    |                      |                      |                      |                                 |
| Up to High School                | reference            | reference            | reference            |                                 |
| College Degree                   | 0.96 (-1.56, 3.48)   | 0.51 (-2.66, 3.67)   | 3.00 (-1.21, 7.21)   | 0.18                            |
| Undergraduate University Degree  | -1.87 (-3.65, -0.09) | -1.44 (-3.78, 0.91)  | -1.93 (-4.76, 0.90)  | 0.76                            |
| Postgraduate University Degree   | -4.34 (-6.15, -2.52) | -3.35 (-5.71, -0.98) | -5.61 (-8.51, -2.71) | 0.47                            |
| <b>Monthly income</b>            |                      |                      |                      |                                 |
| <€500                            | reference            | reference            | reference            |                                 |
| €500-1500                        | 0.87 (-1.42, 3.17)   | 0.21 (-2.56, 3.01)   | 1.97 (-2.22, 6.17)   | 0.50                            |
| €1501-2500                       | -1.81 (-3.91, 0.29)  | -3.28 (-5.93, -0.63) | -0.35 (-3.81, 3.10)  | 0.17                            |
| >€2500                           | -4.05 (-6.55, -1.54) | -6.06 (-9.82, -2.30) | -2.18 (-5.96, 1.60)  | 0.26                            |

\* Estimates derived from a multiple linear regression model, including COVID-19 vaccine hesitancy as the main dependent variable and socioeconomic factors, in turn, as categorical independent variables, adjusting for age, gender, and marital status, and including an interaction term between socioeconomic factors and country of residence.

**Table S2.** Mean difference in COVID-19 vaccine hesitancy scale by socioeconomic characteristics of study participants, stratified by gender.

| Mean difference (95% CI)*        |                      |                      |                      |                                 |
|----------------------------------|----------------------|----------------------|----------------------|---------------------------------|
| Area of residence                | Whole sample         | Men                  | Women                | <i>p</i> -value for interaction |
| Urban (≥10000 residents)         | reference            | reference            | reference            |                                 |
| Semi-urban (2000-9999 residents) | 4.27 (1.16, 7.38)    | 7.42 (2.08, 12.75)   | 2.24 (-1.58, 6.06)   | 0.18                            |
| Rural (<2000 residents)          | -1.12 (-3.25, 1.00)  | -0.08 (-3.46, 3.29)  | -1.97 (-4.72, 0.78)  | 0.25                            |
| <b>Educational attainment</b>    |                      |                      |                      |                                 |
| Up to High School                | reference            | reference            | reference            |                                 |
| College Degree                   | 0.96 (-1.56, 3.48)   | -0.30 (-4.78, 4.18)  | 1.69 (-1.39, 4.78)   | 0.35                            |
| Undergraduate University Degree  | -1.87 (-3.65, -0.09) | -2.09 (-5.06, 0.88)  | -1.51 (-3.76, 0.74)  | 0.45                            |
| Postgraduate University Degree   | -4.34 (-6.15, -2.52) | -5.63 (-8.62, -0.64) | -3.40 (-5.71, -1.09) | 0.11                            |
| <b>Monthly income</b>            |                      |                      |                      |                                 |
| <€500                            | reference            | reference            | reference            |                                 |
| €500-1500                        | 0.87 (-1.42, 3.17)   | 1.41 (-3.26, 6.13)   | 0.15 (-2.48, 2.78)   | 0.54                            |
| €1501-2500                       | -1.81 (-3.91, 0.29)  | -1.94 (-6.22, 2.34)  | -2.37 (-4.80, 0.06)  | 0.61                            |
| >€2500                           | -4.05 (-6.55, -1.54) | -5.29 (-9.83, -0.76) | -2.42 (-5.55, 0.70)  | 0.31                            |

\* Estimates derived from a multiple linear regression model, including COVID-19 vaccine hesitancy as the main dependent variable and socioeconomic factors, in turn, as categorical independent variables, adjusting for age, marital status, and country of residence, and including an interaction term between socioeconomic factors and gender.

**Table S3.** Mean difference in COVID-19 vaccine hesitancy scale by socioeconomic characteristics of study participants, stratified by age-group.

| <b>Area of residence</b>         | <b>Mean difference (95% CI)*</b> |                      |                     | <i>p-value for interaction</i> |
|----------------------------------|----------------------------------|----------------------|---------------------|--------------------------------|
|                                  | <i>Whole sample</i>              | <i>Younger</i>       | <i>Older</i>        |                                |
| Urban (≥10000 residents)         | reference                        | reference            | reference           |                                |
| Semi-urban (2000-9999 residents) | 4.27 (1.16, 7.38)                | 4.49 (1.08, 7.89)    | 1.09 (-6.62, 8.81)  | 0.68                           |
| Rural (<2000 residents)          | -1.12 (-3.25, 1.00)              | -0.94 (-3.37, 1.48)  | -2.32 (-6.60, 1.97) | 0.83                           |
| <b>Educational attainment</b>    |                                  |                      |                     |                                |
| Up to High School                | reference                        | reference            | reference           |                                |
| College Degree                   | 0.96 (-1.56, 3.48)               | -0.60 (-3.36, 2.15)  | 15.99 (7.31, 24.64) | 0.012                          |
| Undergraduate University Degree  | -1.87 (-3.65, -0.09)             | -2.61 (-4.68, -0.53) | -0.74 (-4.28, 2.80) | 0.81                           |
| Postgraduate University Degree   | -4.34 (-6.15, -2.52)             | -5.73 (-7.81, -3.64) | -0.12 (-4.85, 4.26) | 0.14                           |
| <b>Monthly income</b>            |                                  |                      |                     |                                |
| <€500                            | reference                        | reference            | reference           |                                |
| €500-1500                        | 0.87 (-1.42, 3.17)               | -0.01 (-2.56, 2.55)  | 1.52 (-3.89, 6.93)  | 0.52                           |
| €1501-2500                       | -1.81 (-3.91, 0.29)              | -3.01 (-5.35, -0.65) | -1.00 (-6.39, 4.39) | 0.15                           |
| >€2500                           | -4.05 (-6.55, -1.54)             | -5.06 (-7.84, -2.28) | -1.10 (-6.92, 4.72) | 0.30                           |

\* Estimates derived from a multiple linear regression model, including COVID-19 vaccine hesitancy as the main dependent variable and socioeconomic factors, in turn, as categorical independent variables, adjusting for gender, marital status, and country of residence, and including an interaction term between socioeconomic factors and binary age (<60 years vs. ≥60 years).
